# Supplementary material for: Organic template-based ZnO embedded Mn3O4 nanoparticles: synthesis and evaluation of their electrochemical properties towards clean energy generation
Source: Royal Society of Chemistry journal article supplement (doi:10.1039/c9ra10472k), 2020-01-01
Supplement: c9ra10472k1.pdf [file c9ra10472k1.pdf]

Supporting Information.

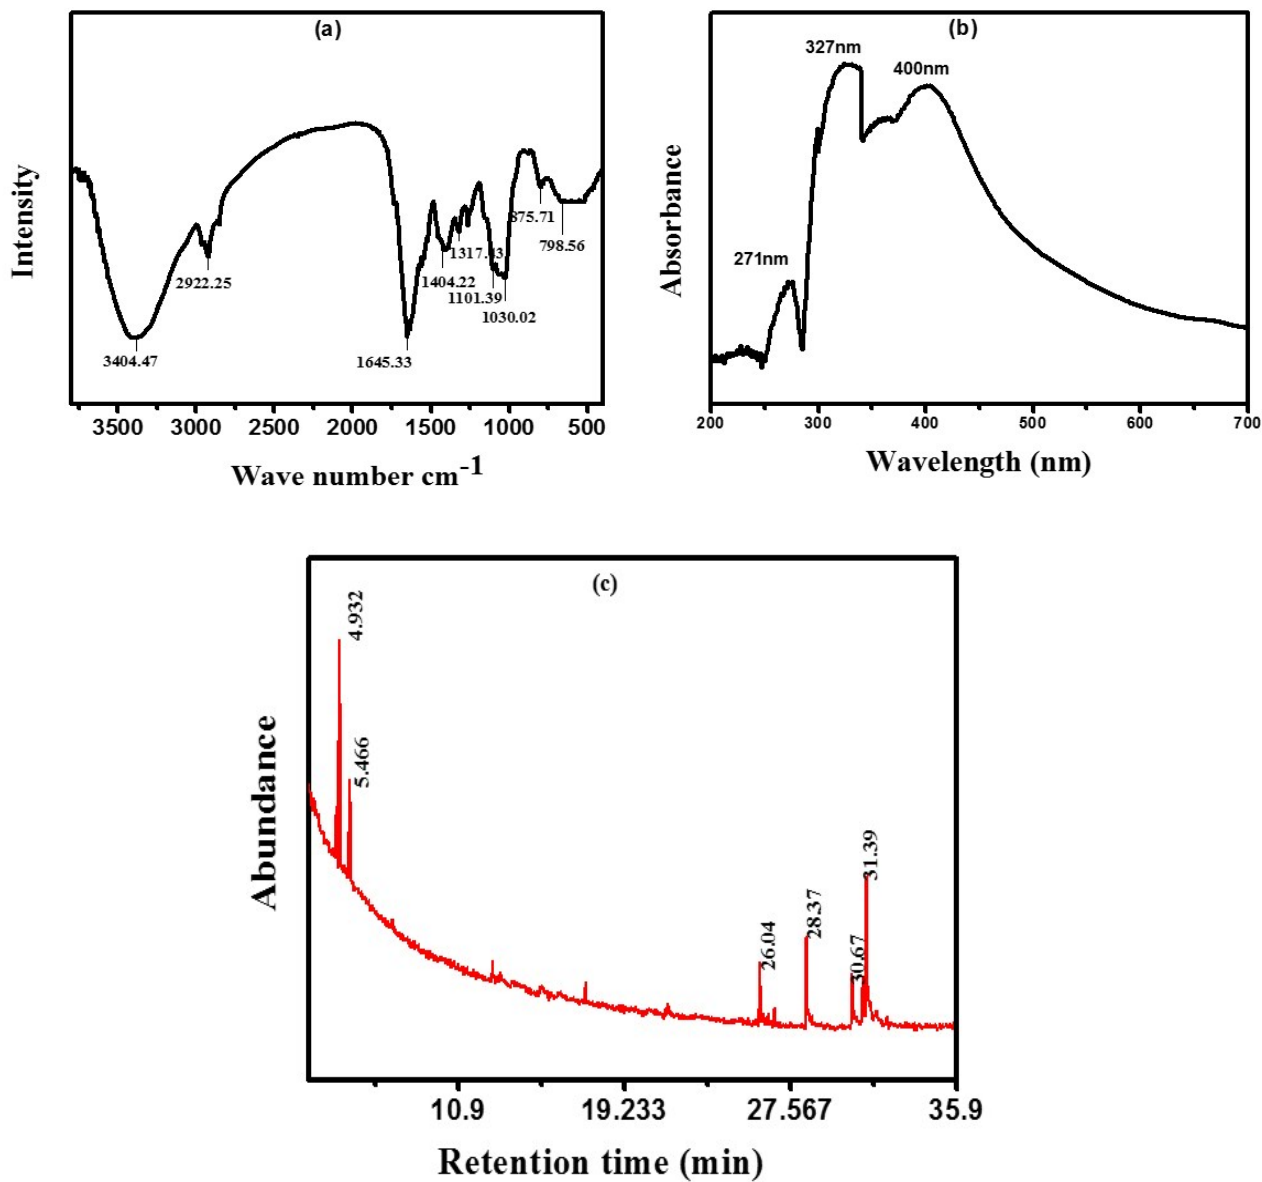

Figure (S-1) Phytochemical analysis of *Olea ferruginea* Royle leaf extract (a) FTIR spectra (b) UV-vis spectra (c) GCMS chromatogram

**Table (S-1). FTIR peak values and Functional groups and UV-vis absorbance and wavelength of *O.ferruginea* Royle plant**

|                           | Peaks   | Bond                           | Functional group                                                 |
|---------------------------|---------|--------------------------------|------------------------------------------------------------------|
| <i>O.ferruginea</i> Royle | 3404.47 | O-H stretch, H bonded          | Alcohols, phenols                                                |
|                           | 2922.25 | C-H stretch                    | Alkanes                                                          |
|                           | 1645.33 | -C=C- stretch                  | Alkenes                                                          |
|                           | 1404.22 | -C-C stretch (in ring)         | Aromatics                                                        |
|                           | 1317.43 | N-O asymmetric stretch         | Nitro compounds                                                  |
|                           | 1261.49 | C-N stretch, C-O, C-H wag      | Amines, alcohols, carboxylic acids, esters, ethers alkyl halides |
|                           | 1101.39 | C-N stretch<br>C-O,<br>C-H wag | Amines, alcohols, carboxylic acids, esters, ethers alkyl halides |
|                           | 1030.02 | C-N stretch                    | Aliphatic amines                                                 |
|                           | 875.71  | =C-H bend                      | Alkenes                                                          |
|                           | 748.56  | =C-H bend, C-Cl stretch        | alkyl halides                                                    |

**Table (S2). Phytochemical analysis of ethanolic extract of *O. ferruginea* Royle leaf extract by GCMS**

| Retention time | Area (%) | Height (%) | F. wt (g/mol) | Formula                           | Compound name       | Structure                                                                             |
|----------------|----------|------------|---------------|-----------------------------------|---------------------|---------------------------------------------------------------------------------------|
| 4.932          | 27.03    | 24.65      | 149           | C <sub>9</sub> H <sub>11</sub> NO | Cathinone           | 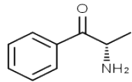 |
| 5.46           | 12.47    | 10.91      | 151           | C <sub>9</sub> H <sub>13</sub> NO | Benzenemethanol     |  |
| 26.04          | 4.68     | 7.63       | 125           | C <sub>8</sub> H <sub>15</sub> N  | 3-Azabicyclo nonane |  |

|        |       |       |     |                                               |                        |                                                                                     |
|--------|-------|-------|-----|-----------------------------------------------|------------------------|-------------------------------------------------------------------------------------|
| 28.36  | 9.45  | 11.46 | 146 | C <sub>6</sub> H <sub>10</sub> O <sub>4</sub> | Propanedioic acid      | 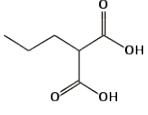 |
| 31.391 | 19.43 | 18.20 | 127 | C <sub>8</sub> H <sub>17</sub> N              | 1-cyclohexylethylamine |  |

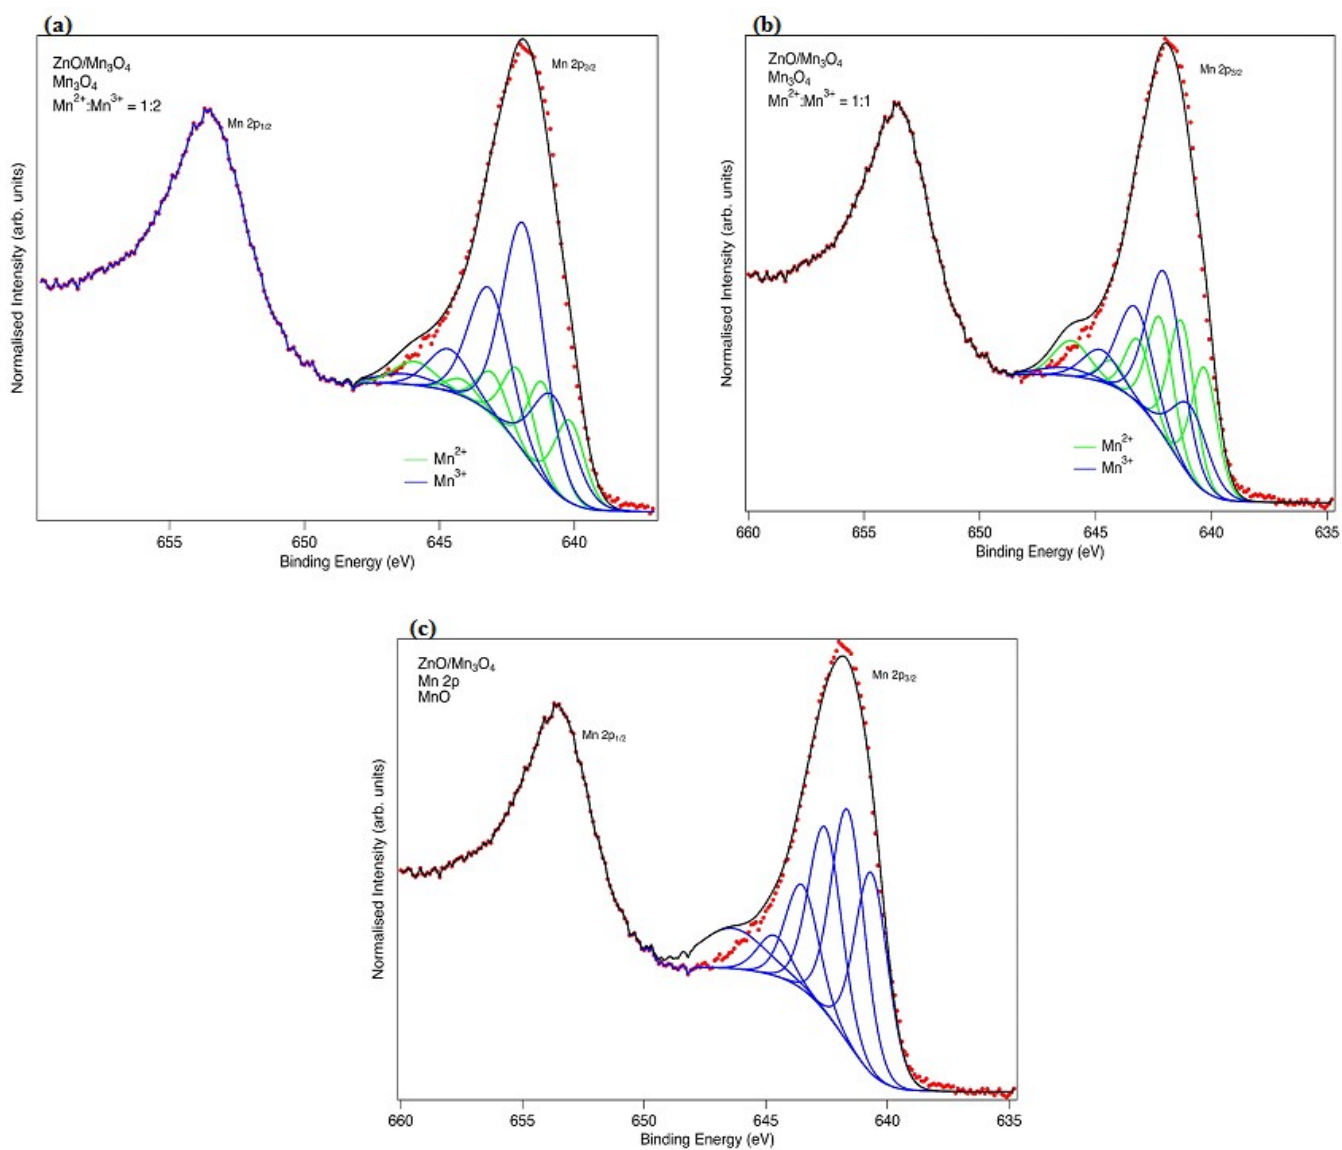

**Figure S-2.** XPS spectra recorded from ZnO/Mn<sub>3</sub>O<sub>4</sub> NPs: (a) Mn<sub>3</sub>O<sub>4</sub> 1:2, (b) Mn<sub>3</sub>O<sub>4</sub> 1:1, (c) Mn2p: MnO
